# Supplementary material
Source: PubMed Central journal article supplement (PMC4120754)
Supplement: NIHMS579434-supplement-Supplemental_data.pdf [file NIHMS579434-supplement-Supplemental_data.pdf]

## SUPPLEMENTAL DATA

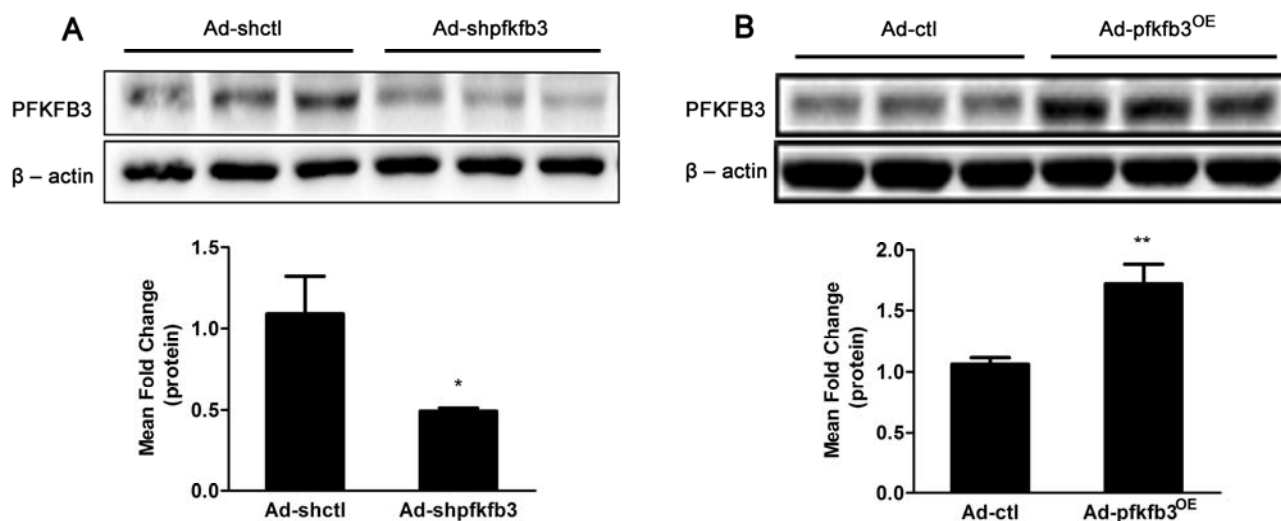

### Supplemental figure I. PFKFB3 knockdown or overexpression in HUVECs.

HUVECs were transfected with Ad-shctl, Ad-shpfb3 (A), Ad-ctl, and/or Ad-pfb3 (B) for 36 h and then collected for analysis of PFKFB3 expression using Western blotting. For bar graphs, data are the mean  $\pm$  SD, n = 3. \*,  $P < 0.05$  and \*\*,  $P < 0.01$  Ad-shpfb3 vs. vs. Ad-shctl or Ad-pfb3<sup>OE</sup> vs Ad-ctl.

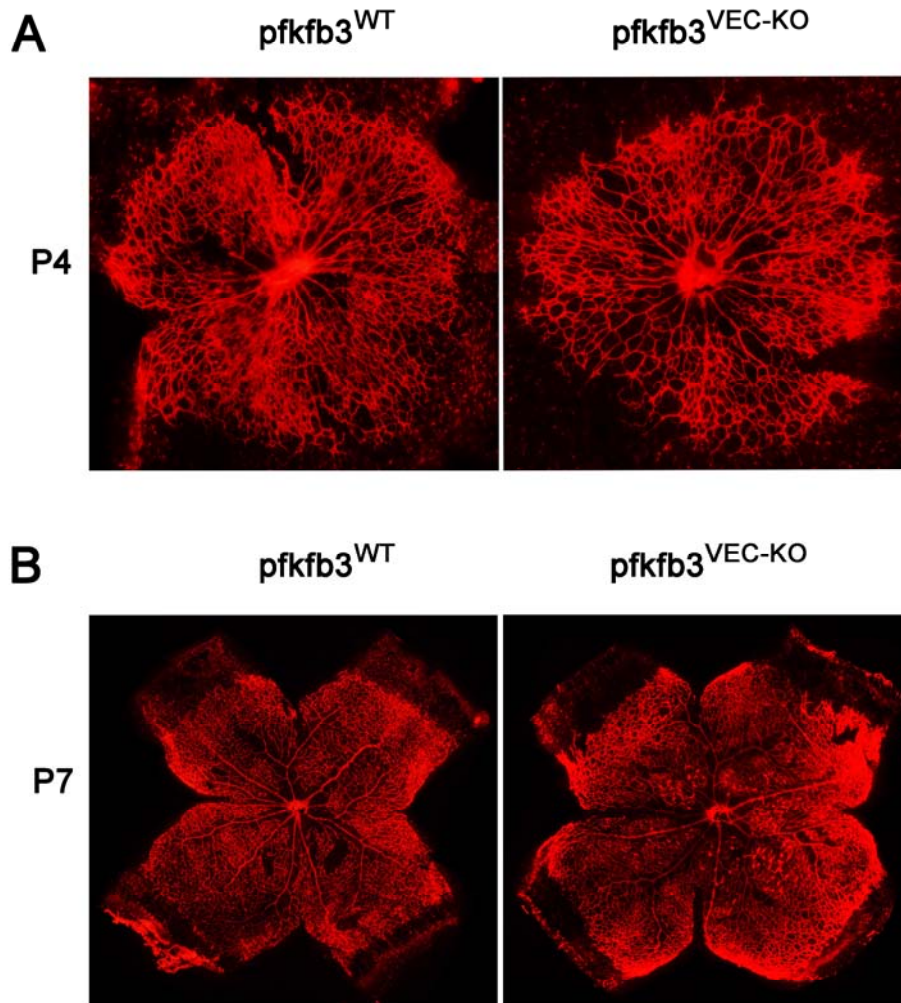

**Supplemental figure II. The effects of PFKFB3 deficiency on normal postnatal retinal development.**

A, Isolectin staining of whole-mount retinal samples of PFKFB3<sup>flox/flox</sup> and PFKFB3<sup>flox/flox</sup>cdh5<sup>cre</sup> mice at P4 (n = 8 mice per genotype). B, Isolectin staining of whole-mount retinal samples of PFKFB3<sup>flox/flox</sup> and PFKFB3<sup>flox/flox</sup>cdh5<sup>cre</sup> mice at P7 (n = 8 mice per genotype).

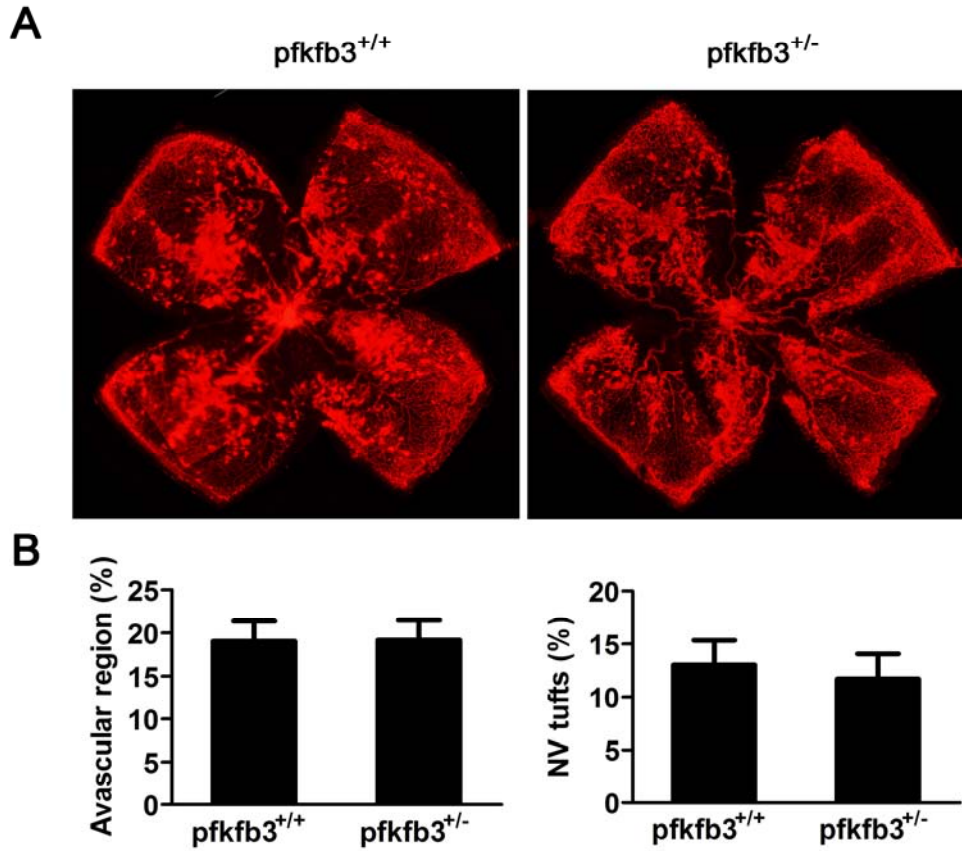

**Supplemental figure III. The oxygen-induced retinopathy in  $pfkfb3^{+/+}$  and  $pfkfb3^{+/-}$  mice.**

A, Representative images of isolectin-stained whole-mount retinal samples of PFKFB3<sup>+/+</sup> and PFKFB3<sup>+/-</sup> OIR mice at P17. B, Quantification of the neovascular tuft (NVT) and avascular areas (n = 8 mice per genotype).

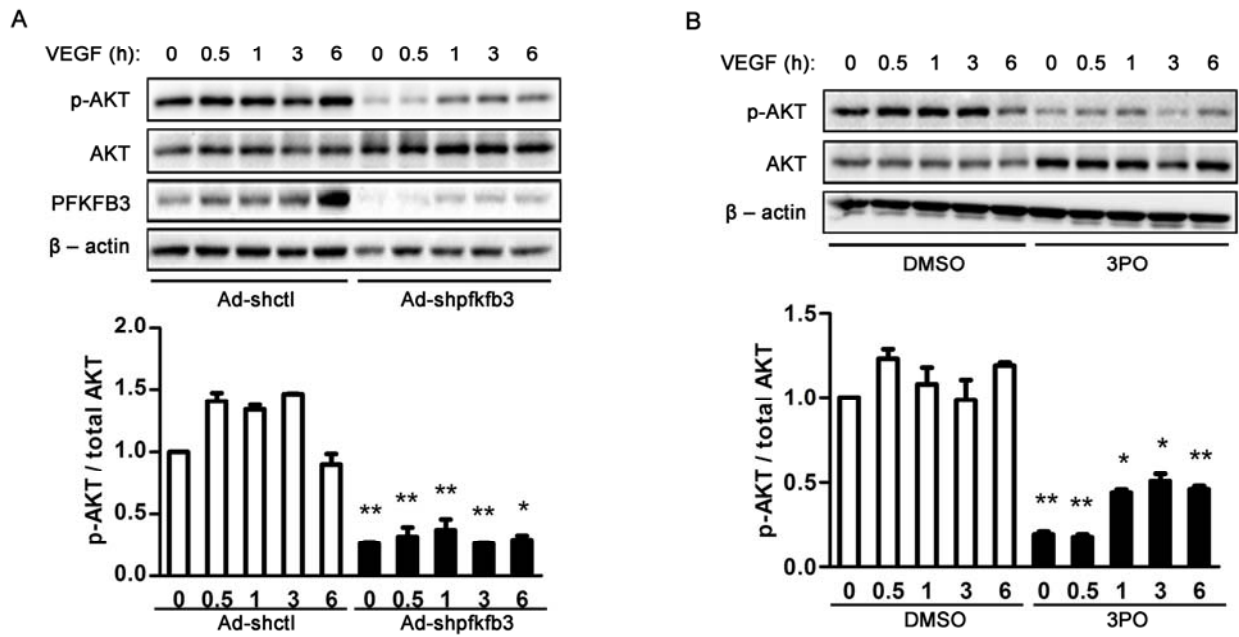

**Supplemental figure IV. AKT as downstream event of PFKFB3 in endothelial cells following VEGF treatment.**

A, Western blot analysis of p-AKT and AKT in control and PFKFB3-knockdown HUVECs upon VEGF treatment for 0, 1/2, 1, 3 or 6 hrs. B, Western blot analysis of p-AKT and AKT in control and 3PO-treated HUVECs exposed to VEGF for 0, 1/2, 1, 3 or 6 hr. All images shown are representative, and data are the mean  $\pm$  SD (n = 3 independent experimental groups). \*,  $P < 0.05$  and \*\*,  $P < 0.01$  Ad-shpfkfb3 vs. Ad-shctl or 3PO vs DMSO under the same condition.

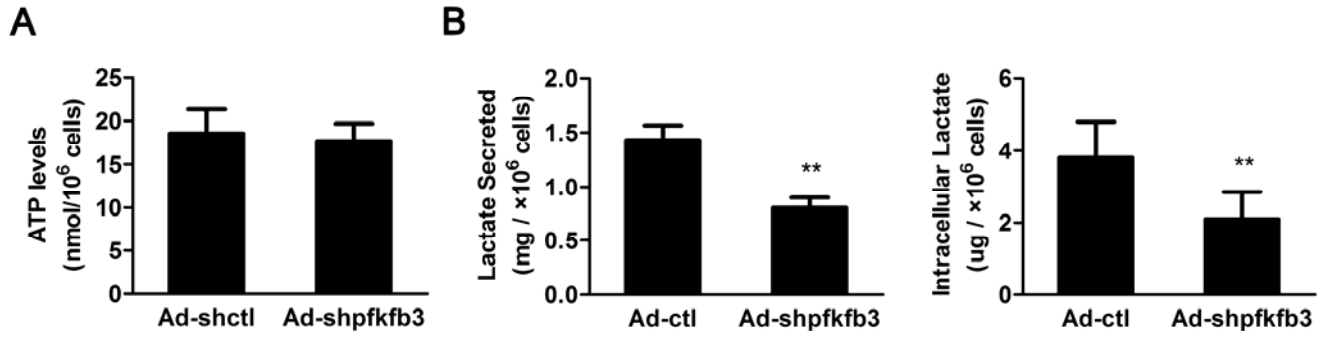

**Supplemental figure V. Lactate production in PFKFB3-knockdown HUVECs under hypoxic conditions.**

A, Quantification of ATP levels in PFKFB3-knockdown HUVECs and control cells after 24 h incubation. B, Quantification of secreted lactate levels and intracellular lactate levels in PFKFB3-knockdown HUVECs and control cells after 72 h hypoxic treatment. Data are the mean  $\pm$  SD (n = 3).

\*\* ,  $P < 0.01$  Ad-shpfkfb3 vs. Ad-shctl under the same condition.

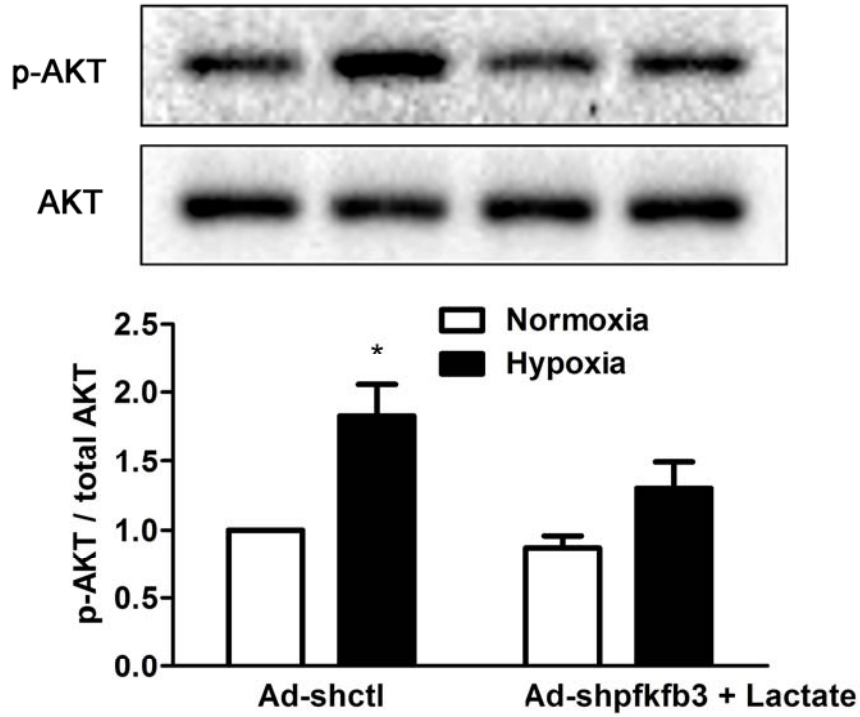

**Supplemental figure VI. Western blot analysis of p-AKT and AKT in PFKFB3-knockdown HUVECs upon hypoxia.**

PFKFB3-knockdown HUVECs and control cells were exposed to normoxia and/or hypoxia for 6 h.

For the PFKFB3-knockdown HUVECs, 10 mM sodium lactate was added 1 h before exposed to normoxia and/or hypoxia. Data are the mean  $\pm$  SD (n = 3). \*,  $P < 0.05$  hypoxia vs. normoxia in control HUVECs.

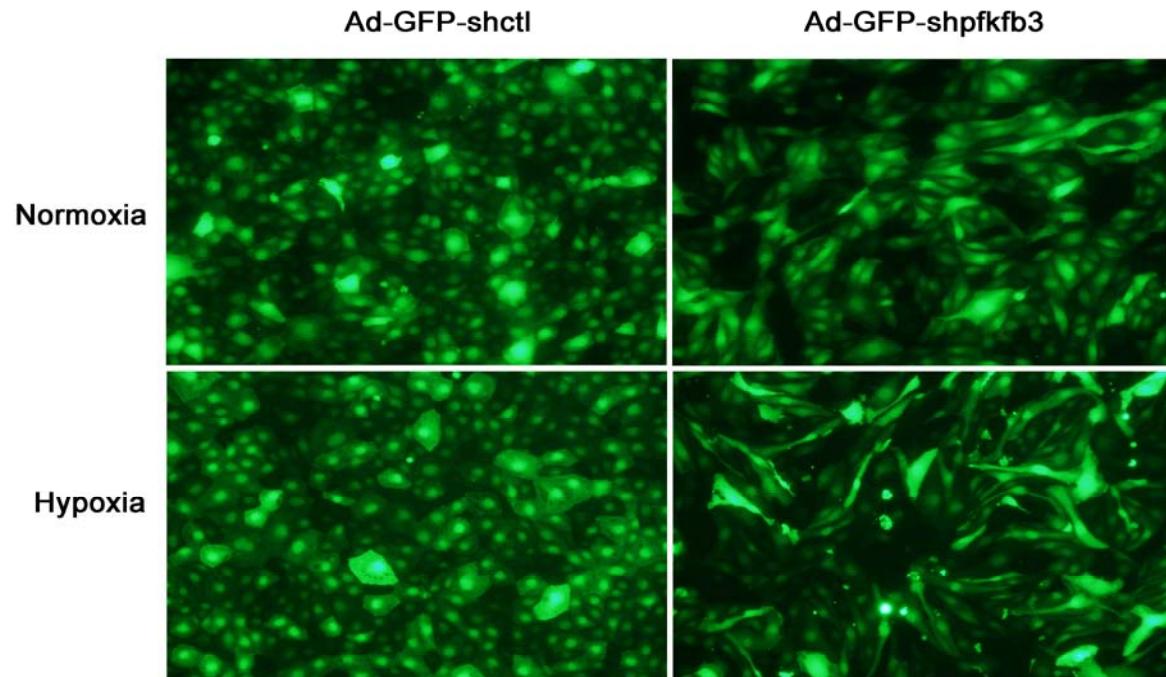

**Supplemental figure VII. Morphology of PFKFB3-knockdown HUVECs.**

Representative photomicrographs of cultured PFKFB3-knockdown HUVECs and control cells exposed to normoxia or hypoxia (0.5% oxygen) for 24 h.

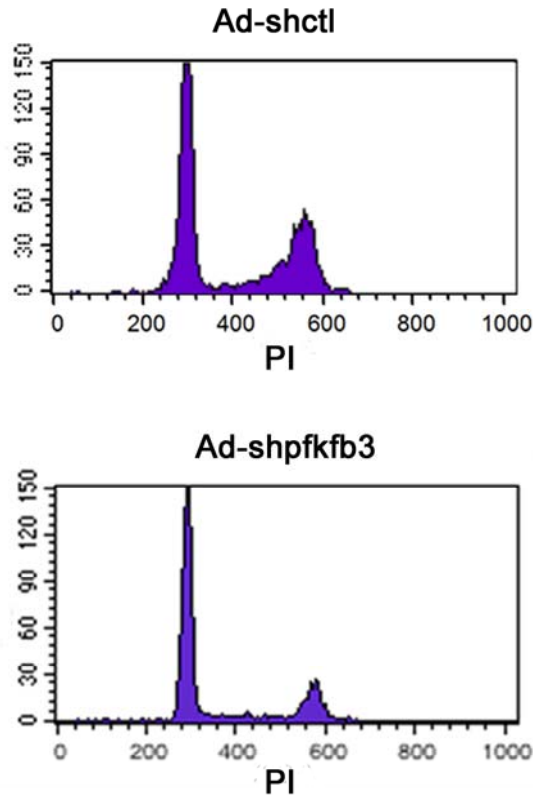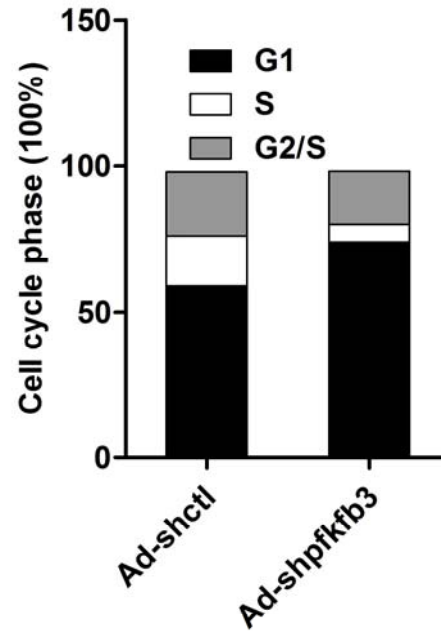

**Supplemental figure VIII. The cell cycle of PFKFB3-knockdown HUVECs under hypoxic conditions.**

PFKFB3-knockdown HUVECs and control cells were synchronized in G0/G1 by total FBS depletion for 16 h and then exposed to complete medium for an additional 24 h under hypoxic condition (0.5% oxygen).



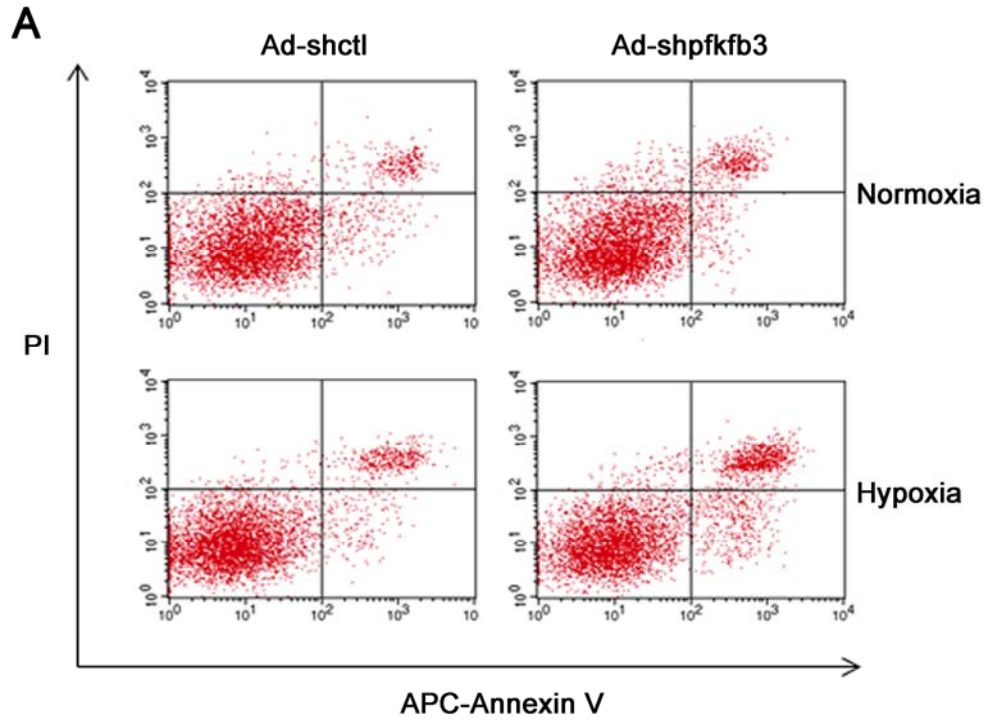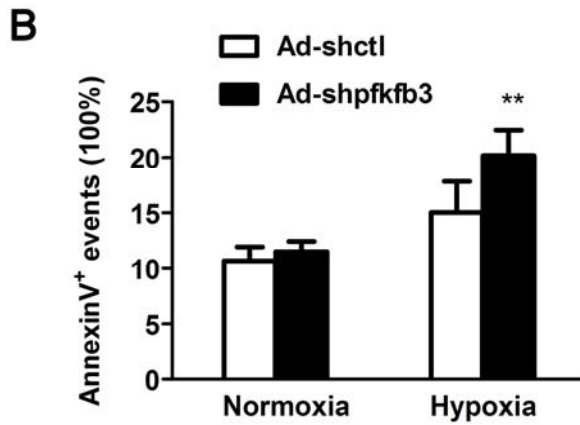

**Supplemental figure IX. Involvement of PFKFB3 in endothelial apoptosis.**

A, Flow cytometric analysis of apoptosis in PFKFB3-knockdown HUVECs and control cells under a normoxic or hypoxic environment. B, Quantification of the annexin V<sup>+</sup> HUVEC ratio for each group.

\*\* $, P < 0.01$  Ad-shpfb3 vs. Ad-shctl under the same condition.

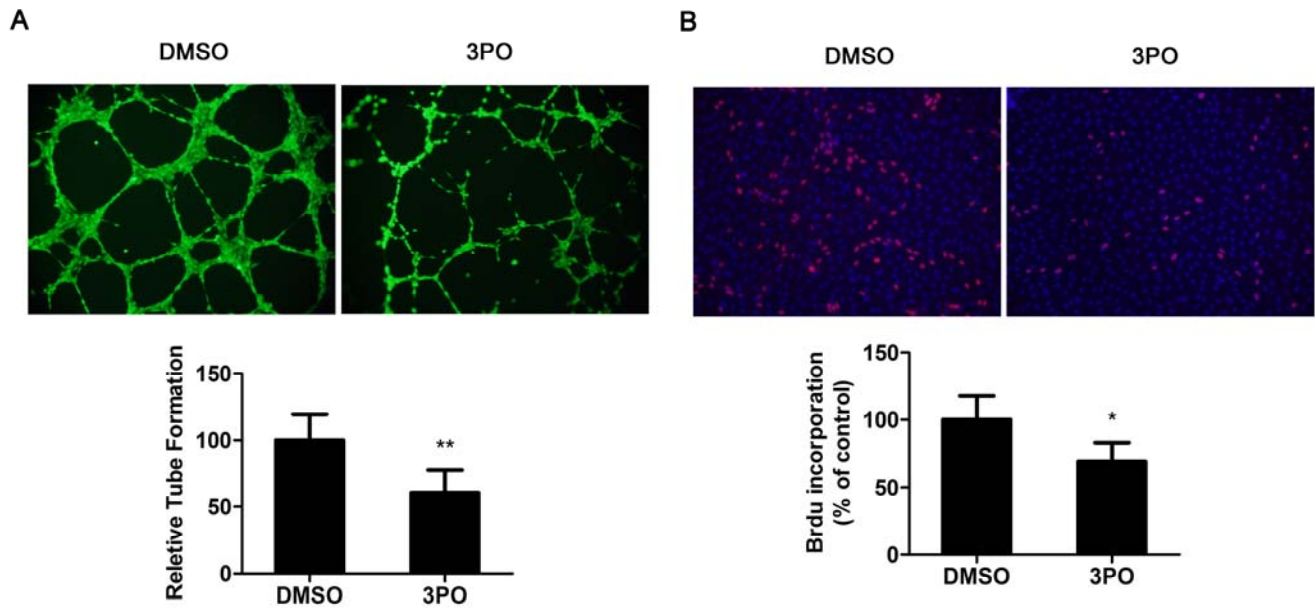

**Supplemental figure X. Involvement of PFKFB3 in endothelial proliferation and tube formation.**

A, Representative images and quantification of tube formation in 3PO-treated HUVECs and control cells cultured in growth factor-deprived Matrigel. B, BrdU staining of proliferating HUVECs. 3PO-treated cells and control cells were synchronized in G0/G1 by total FBS depletion for 16 h and then incubated with complete medium for an additional 24 h. For bar graphs, data are the mean  $\pm$  SD, n = 3. \*,  $P < 0.05$  and \*\*,  $P < 0.01$  3PO vs. control. All images shown are representative.

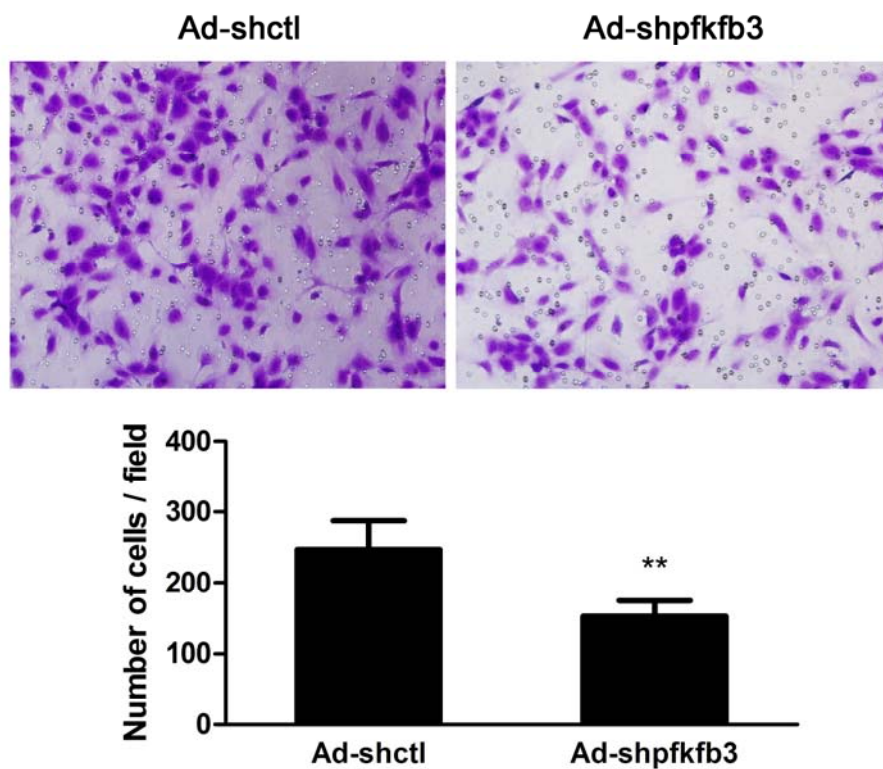

**Supplemental figure XI. Involvement of PFKFB3 in endothelial migration.**

Representative images and quantification of endothelial migration. PFKFB3-knockdown HUVECs and control cells cultured in a transwell migrated to cell medium with hVEGF at 20ng/mL. For bar graph, data are the mean  $\pm$  SD, n = 3. \*\*,  $P < 0.01$  for Ad-shpfkfb3 vs. Ad-shctl.

**Supplemental table I. Primer sequences for QRT-PCR analysis**

| Gene              | Forward primer (5'-3')   | Reverse primer (5'-3')   |
|-------------------|--------------------------|--------------------------|
| Mouse pfkfb3      | GATCTGGGTGCCCGTCGATCACCG | CAGTTGAGGTAGCGAGTCAGCTTC |
| Human pfkfb1      | CTCCATCTACCT TTGCCGACA   | GCCCTGGGACTGAATGAAGTT    |
| Human pfkfb2      | CACCAATACAACCCGGGAGA     | GCAGCAATGACATCAGGATCA    |
| Human pfkfb3      | CTCGCATCAACAGCTTTGAGG    | TCAGTGTTTCCTGGAGGAGTC    |
| Human pfkfb4      | CCAAGTGCCCAACTCTCATTG    | GCGATACTGGCCAACATTGAA    |
| Mouse HPRT        | AGTGTTGGATACAGGCCAGAC    | CGTGATTCAAATCCCTGAAGT    |
| 18S ribosomal RNA | GCCTCACTAAACCATCCAA      | TCAGTGTTTCCTGGAGGAGTC    |
